# Supplementary material for: Electric field and strain tunable band gap and band alignments of MoSi2N4/MSe (M = In, Ga) van der Waals heterostructures
Source: Royal Society of Chemistry journal article supplement (doi:10.1039/d4lf00239c), 2024-01-01
Supplement: d4lf00239c1.pdf [file d4lf00239c1.pdf]

## Supplementary material

### Electric field and strain tunable band gap and band alignments of $\text{MoSi}_2\text{N}_4/\text{MSe}$ ( $\text{M} = \text{In}, \text{Ga}$ ) van der Waals heterostructures

Jin Quan Ng, Qingyun Wu, L. K. Ang<sup>1,\*</sup>, and Yee Sin Ang<sup>\*</sup>

<sup>1</sup>Science, Mathematics and Technology, Singapore University of Technology and Design (SUTD), 8 Somapah Road, 487372, Singapore

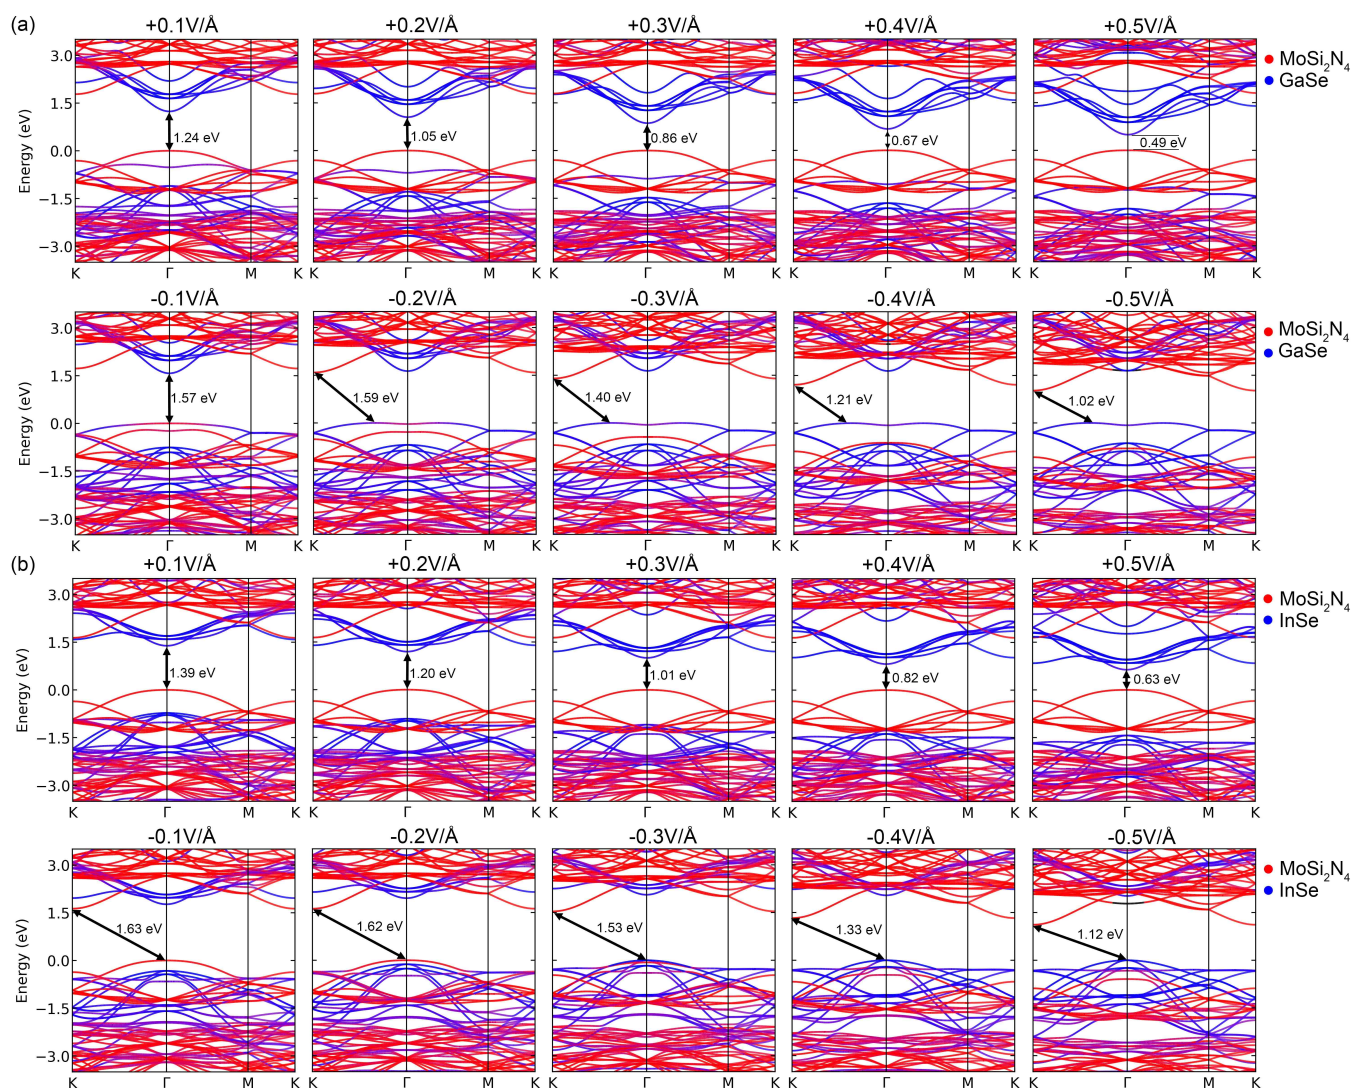

Fig. S 1. Band structures of (a)  $\text{MoSi}_2\text{N}_4/\text{GaSe}$  (b)  $\text{MoSi}_2\text{N}_4/\text{InSe}$  under external electric field. Vacuum states exist at higher external electric field, but have low electron counts and hence negligible effect on band gap for included range.

\* Authors to whom correspondence should be addressed: ricky\_ang@sutd.edu.sg and yeesin\_ang@sutd.edu.sg

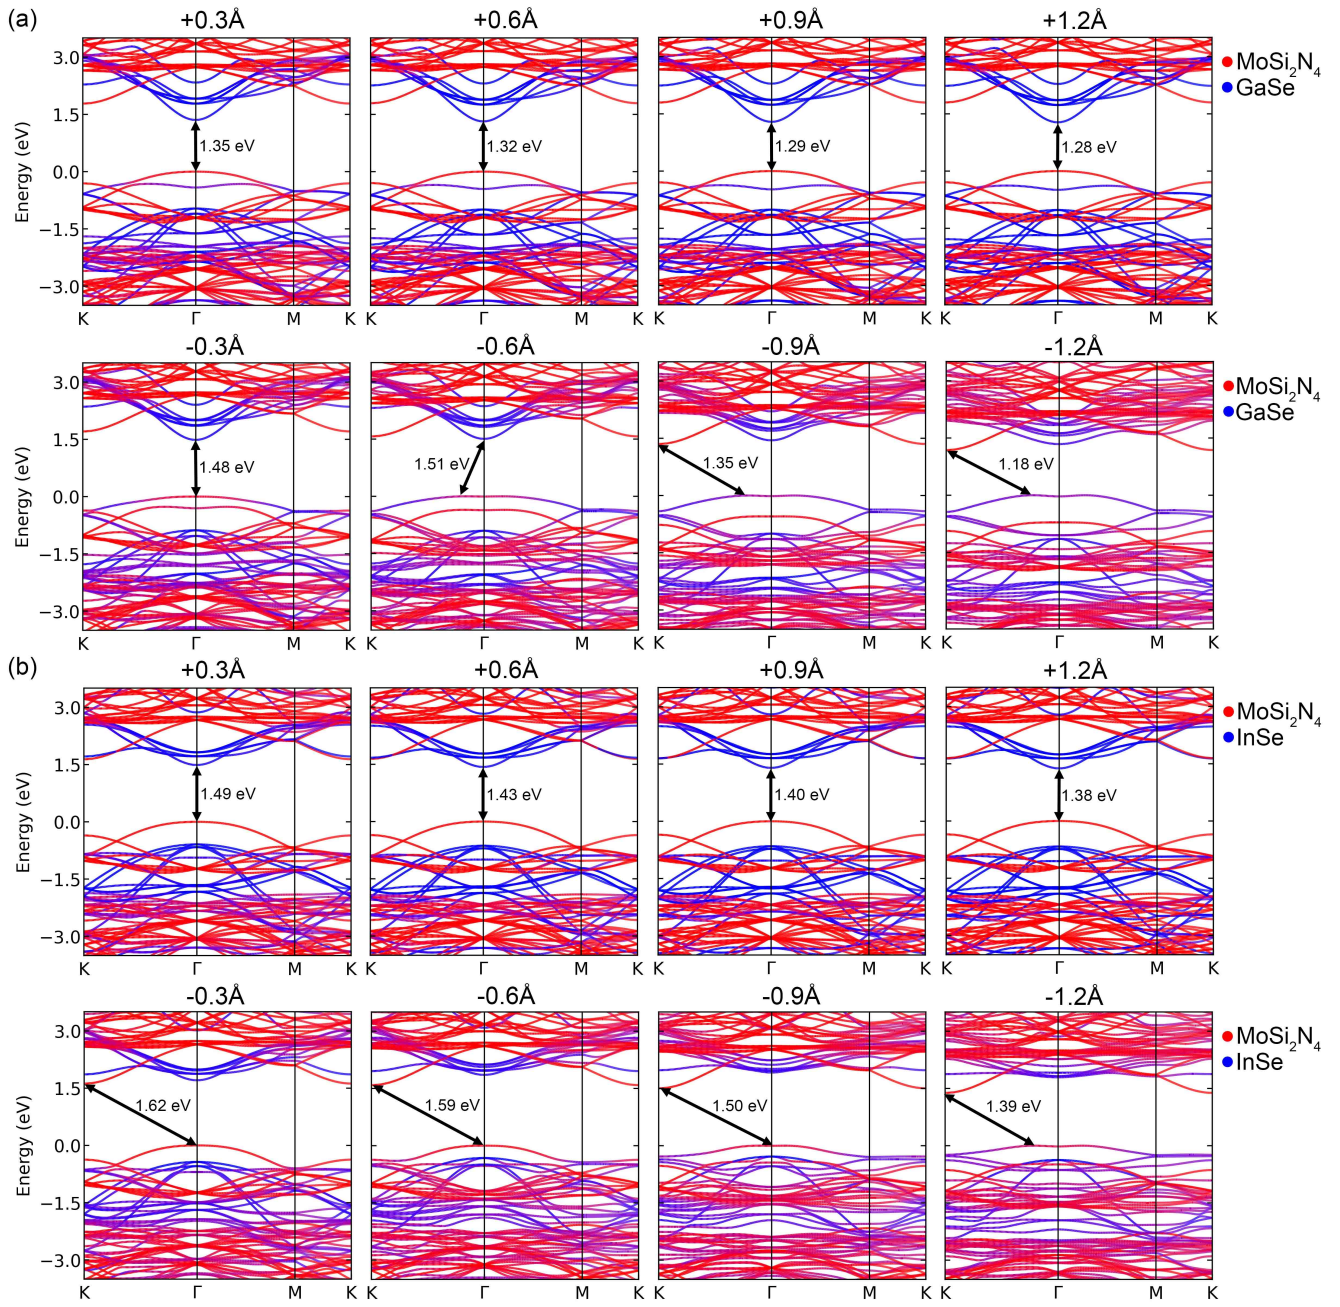

Fig. S 2. Band structures of (a) MoSi<sub>2</sub>N<sub>4</sub>/GaSe (b) MoSi<sub>2</sub>N<sub>4</sub>/InSe under vertical strain. Negative vertical strain is compressive.



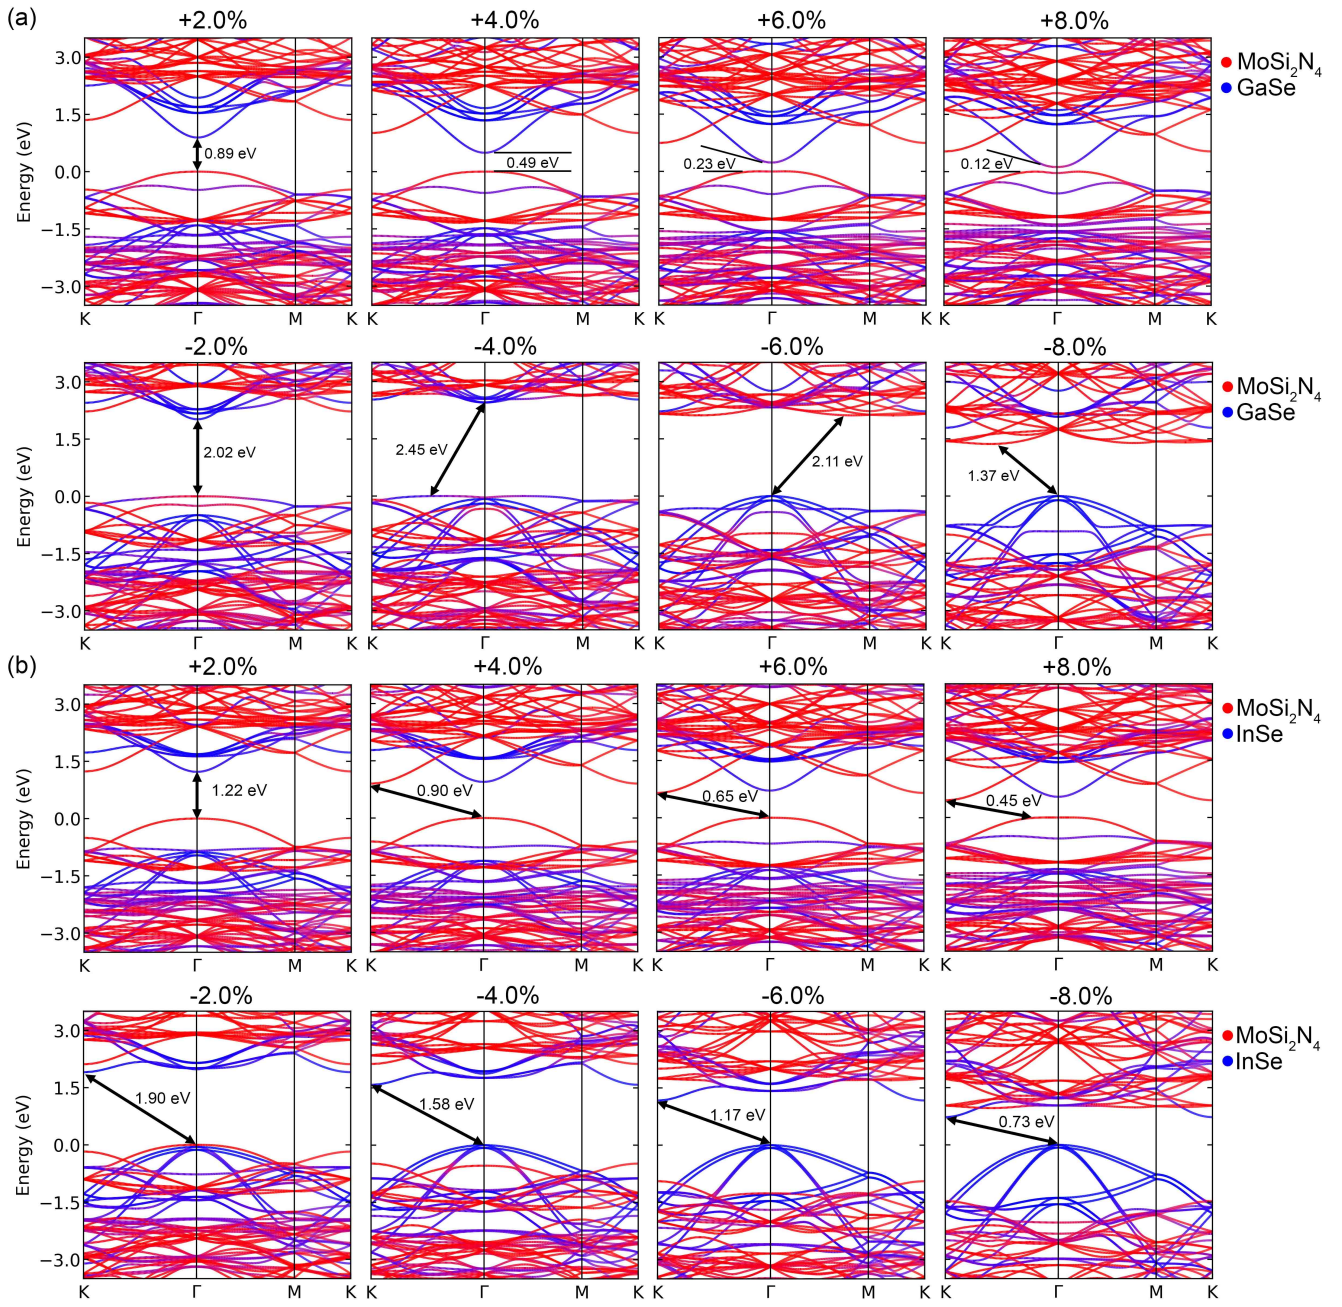

Fig. S 3. Band structures of (a) MoSi<sub>2</sub>N<sub>4</sub>/GaSe (b) MoSi<sub>2</sub>N<sub>4</sub>/InSe under biaxial strain. Negative biaxial strain is compressive.
